# Supplementary material for: ESIPT-modulated HBT–o-carborane dyads with efficient aggregation-induced emission and acid-induced discolouration properties
Source: Royal Society of Chemistry journal article supplement (doi:10.1039/d4tc02889a), 2024-01-01
Supplement: d4tc02889a1.pdf [file d4tc02889a1.pdf]

# Supporting Information

## ESIPT-modulated HBT-*o*-carborane Dyads with Efficient Aggregation-induced Emission and Acid-induced Discolouration Properties

Xueyan Wu<sup>†\*</sup>, Chenxi Zhang<sup>†</sup>, Na Li, Yan Lv, Jinxia Chi, Jixi Guo<sup>\*</sup>

*State Key Laboratory of Chemistry and Utilization of Carbon Based Energy*

*Resources; College of Chemistry, Xinjiang University, Urumqi, 830017, Xinjiang, PR  
China.*

*E-mail: Wuxy90@xju.edu.cn, jxguo1012@163.com*

### Table of Contents

|                                                             |     |
|-------------------------------------------------------------|-----|
| 1. Synthesis.....                                           | S2  |
| 2. UV-Vis absorption and fluorescence emission spectra..... | S3  |
| 3. DFT calculation.....                                     | S8  |
| 4. NMR Spectra of all new compounds.....                    | S13 |
| 5. References.....                                          | S18 |

## 1. Synthesis

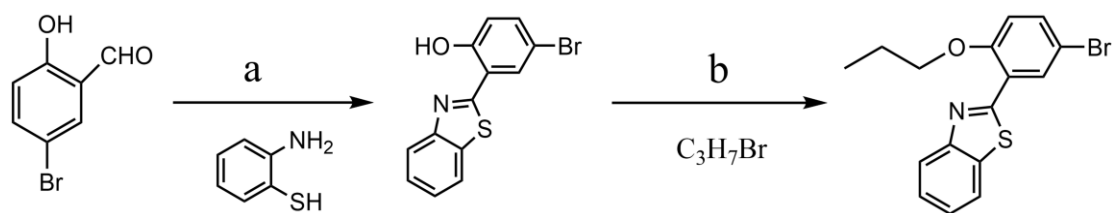

**Scheme S1.** synthetic routes for compounds **1** and **2**.

**Compound 1:** A solution of 2-aminothiophenol (4 mL, 4 mmol) and 5-bromosalicylaldehyde (800 mg, 4 mmol) in EtOH (10 mL), aqueous H<sub>2</sub>O<sub>2</sub> (30%, 24.0 mmol) and aqueous HCl (37%, 15 mmol) was stirred for 6 h at ambient temperature. Then, the reaction was quenched with water (10 mL) and the organic layer was extracted with CH<sub>2</sub>Cl<sub>2</sub> (3×30 mL) and dried over anhydrous MgSO<sub>4</sub>. The solvent was removed under reduced pressure and the residue was purified by silica gel column chromatography using dichloromethane/petroleum ether (1/9, v/v) as the eluent to obtain target compound 1. The molecular structure characterisation results are in agreement with literature results.<sup>[1]</sup> Yield: 90%. <sup>1</sup>H NMR (400 MHz, CDCl<sub>3</sub>) δ 12.53 (s, 1H), 8.01 (t, *J* = 14.4 Hz, 1H), 7.93 (t, *J* = 12 Hz, 1H), 7.80 (d, *J* = 7.2 Hz, 1H), 7.53 (t, *J* = 14.4 Hz, 1H), 7.48 – 7.42 (m, 2H), 7.01 (d, *J* = 10.4 Hz, 1H).

**Compound 2:** The mixture of compound 1 (4.896 g, 16 mmol), K<sub>2</sub>CO<sub>3</sub> (3.980 g, 28.8 mmol) and N,N-dimethyl formamide (20 mL) were stirred at room temperature, then bromopropane (8.855 g, 72 mmol) was added. The mixture were stirred at 50 °C for 4 h. Then, the reaction was quenched with water (10 mL) and the organic layer was extracted with CH<sub>2</sub>Cl<sub>2</sub> (3×30 mL) and dried over anhydrous MgSO<sub>4</sub>. The solvent was removed under reduced pressure and the target compound 2 was obtained after drying. The molecular structure characterisation results are in agreement with

literature results.<sup>[2]</sup> Yield: 98%. <sup>1</sup>H NMR (400 MHz, CDCl<sub>3</sub>) δ 8.71 (d, *J* = 6.4 Hz, 1H), 8.12 – 8.07 (m, 1H), 7.93 (t, *J* = 11.2 Hz, 1H), 7.53 – 7.47 (m, 2H), 7.39 (t, *J* = 14.4 Hz, 1H), 6.91 (d, *J* = 9.6 Hz, 1H), 4.15 (t, *J* = 14.4 Hz, 2H), 2.04 (t, *J* = 28 Hz, 2H), 1.18 (t, *J* = 18 Hz, 3H).

## 2. UV-vis absorption and fluorescence emission spectra

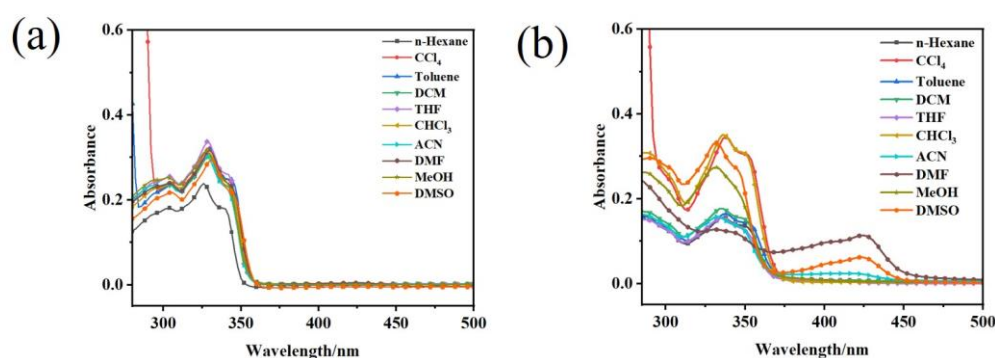

Fig. S1 UV-visible absorption spectra of compounds (a) C-HBTP ( $\lambda_{\text{ex}} = 327$  nm), (b) C-HBTO ( $\lambda_{\text{ex}} = 335$  nm) in different solvents ( $c = 1.0 \times 10^{-5}$  M, 25 °C)

The simplest consideration for general solvent effect is the Lippert-Mataga equation, by assuming that same excited-state is involved in absorption and emission, and energy difference between the ground- and excited-state is only proportional to solvent orientation polarizability ( $\Delta f$ ).

$$\Delta\nu = \frac{2\Delta f}{4\pi\epsilon_0 hca^3} (\mu_e - \mu_g)^2 + \text{constant} \quad (1)$$

$$\Delta f = \frac{\epsilon - 1}{2\epsilon + 1} - \frac{n^2 - 1}{2n^2 + 1} \quad (2)$$

where  $\Delta\nu = \nu_{\text{abs}} - \nu_{\text{em}}$  stands for Stokes' shift,  $\nu_{\text{abs}}$  and  $\nu_{\text{em}}$  are absorption and emission ( $\text{cm}^{-1}$ ),  $h$  is the Planck's constant,  $c$  is the velocity of light in vacuum,  $a$  is the radius of the solvent cavity in which the fluorophore resides (Onsager cavity radius).  $\Delta f$  is the orientation polarizability,  $\mu_e$  and  $\mu_g$  is the ground-state dipole in the ground-state geometry and the excited dipole in the excited-state geometry and  $\epsilon_0$  is the permittivity of the vacuum.

**Table S1.** Absorption and emission spectra of **C-HBTP** and **C-HBTO**.<sup>[a]</sup>

| Solvent  | <b>C-HBTP</b>                     |                                  |                                  | <b>C-HBTO</b>                     |                                  |                                  | $\Delta f$ |
|----------|-----------------------------------|----------------------------------|----------------------------------|-----------------------------------|----------------------------------|----------------------------------|------------|
|          | $\lambda_{\text{abs}}(\text{nm})$ | $\lambda_{\text{em}}(\text{nm})$ | Stokes shift( $\text{cm}^{-1}$ ) | $\lambda_{\text{abs}}(\text{nm})$ | $\lambda_{\text{em}}(\text{nm})$ | Stokes shift( $\text{cm}^{-1}$ ) |            |
| n-hexane | 340                               | 363, 510                         | 1863, 9803                       | 350                               | 511                              | 9002                             | 0.001      |
| Toluene  | 342                               | 369, 511                         | 2139, 9670                       | 353                               | 510                              | 8843                             | 0.014      |
| DCM      | 343                               | 370, 545                         | 2127, 10805                      | 352                               | 508                              | 8720                             | 0.217      |
| THF      | 342                               | 369, 536                         | 2139, 10583                      | 351                               | 528                              | 8724                             | 0.210      |
| ACN      | 342                               | 370, 576                         | 2212, 11875                      | 348, 420                          | -                                | 9550                             | 0.305      |
| DMF      | 343                               | 372, 572                         | 2272, 11672                      | 345, 424                          | -                                | -                                | 0.275      |
| MeOH     | 343                               | 373, 548                         | 2344, 10906                      | 345                               | 509                              | -                                | 0.302      |
| DMSO     | 344                               | 377, 578                         | 2544, 11768                      | 346 424                           | -                                | 9339                             | 0.260      |

<sup>[a]</sup>Measured in various solution ( $1 \times 10^{-3}$  M) at room temperature, C-HBTP ( $\lambda_{\text{ex}} = 327$  nm), (b) C-HBTO ( $\lambda_{\text{ex}} = 335$  nm), respectively.

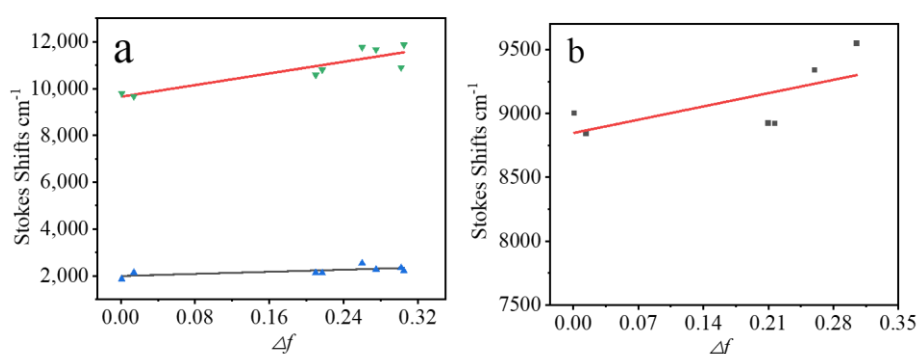**Fig S2.** Lippert–Mataga plots of (a) **C-HBTP** and (b) **C-HBTO**.

It is known that the solvent polarity effect can be analyzed by the difference in the dipole moments of the ground and excited states, and the Stokes shift is proportional to the dipole moment change. This phenomenon can be elucidated using a Lippert–Mataga plot, which is a plot of the Stokes shift against the solvent polarizability,  $\Delta f$  [3,4,5]. As shown in Fig. S2, the slope of emission band around 350 and 530 nm are  $1127 \text{ cm}^{-1}$   $6226 \text{ cm}^{-1}$  for **C-HBTP**, respectively. On the other hand, the slope of emission band around 530 nm for **C-HBTO** is  $1486 \text{ cm}^{-1}$ . These data indicate that the luminescent bands around 350 and 530 nm for **C-HBTP** should be assigned to the LE state and the ICT state, respectively. And further indicating that the weak electron interaction of *o*-carborane and HBT under the formed keto tautomer in **C-HBTO**. Besides, according to the Lippert–Mataga equation the dipole moment changes ( $\Delta\mu$ ) for compounds **C-HBTP** and **C-HBO** were estimated to be 5.61 and 3.13 Debye, respectively. One Debye unit is  $1.0 \times 10^{-18}$  esu cm. 4.8 Debye is the dipole moment that results from a charge separation of one unit charge ( $4.8 \times 10^{-10}$  esu) by 1 Å ( $10^{-8}$  cm) [6]. Therefore, the measured changes of the dipole moments forecast that one electron (unit charge) shifting a distance of  $\sim 1.17$  Å for **C-HBTP**, which corresponding to the distance between the HBT donor and the

carbon atom of the *o*-carborane acceptor. But for **C-HBTO**, the dipole moment changes ( $\Delta\mu$ ) is only 3.13 Debye less half than that of **C-HBTP**.

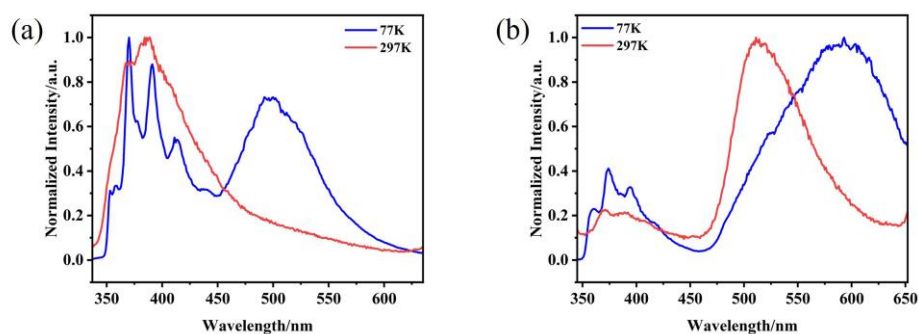

Fig. S3 The emission spectra of (a) **C-HBTP** ( $\lambda_{\text{ex}} = 327$  nm) and (b) **C-HBTO** ( $\lambda_{\text{ex}} = 335$  nm) in 2-MeTHF at r.t. and 77K,  $c = 1.0 \times 10^{-5}$  M.

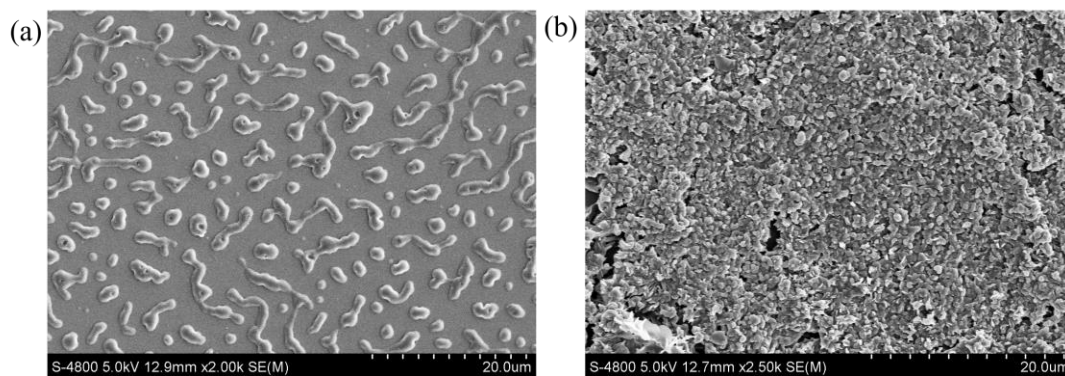

Fig. S4 SEM images of (a) **C-HBTP** and (b) **C-HBTO** at 99%  $f_w$ .

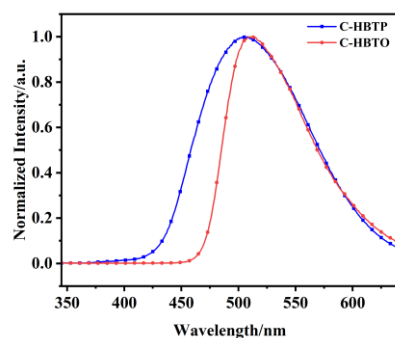

Fig. S5 Normalized solid-state luminescence spectra of **C-HBTP** ( $\lambda_{\text{ex}} = 327$  nm) and **C-HBTO** ( $\lambda_{\text{ex}} = 335$  nm) in the solid state.

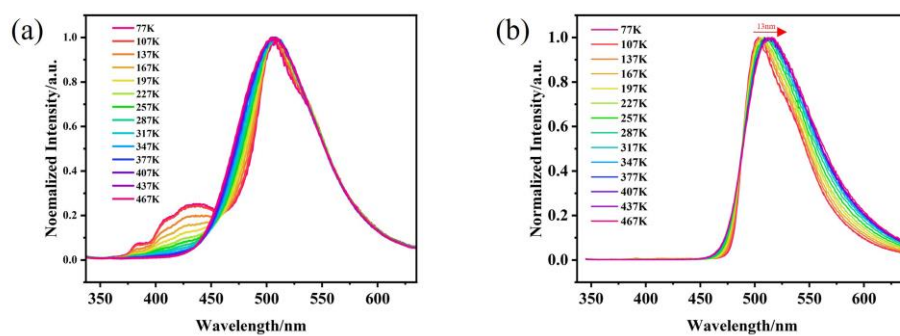

Fig. S6 Normalized temperature-dependent emission spectra of (a) **C-HBTP** ( $\lambda_{\text{ex}} = 327$  nm) and (b) **C-HBTO** ( $\lambda_{\text{ex}} = 335$  nm) in the solid state with temperature variation in the range of 77-467 K.

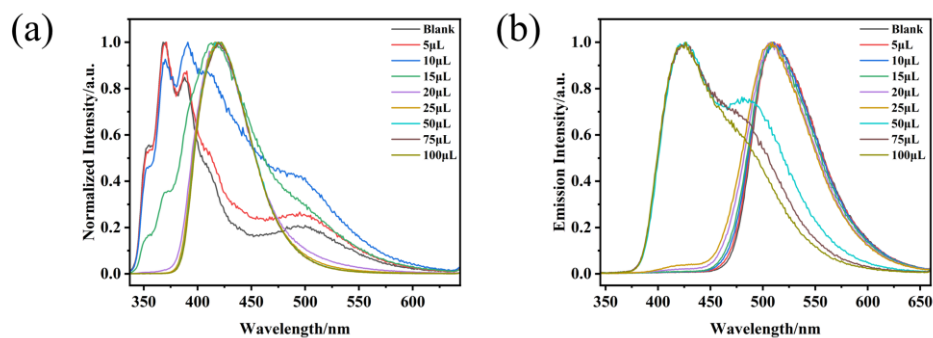

Fig. S7 Normalized luminescence spectra of (a) **C-HBTP** ( $\lambda_{\text{ex}} = 327$  nm) and (b) **C-HBTO** ( $\lambda_{\text{ex}} = 335$  nm) in  $\text{CCl}_4$  at different trifluoroacetic acid concentrations.

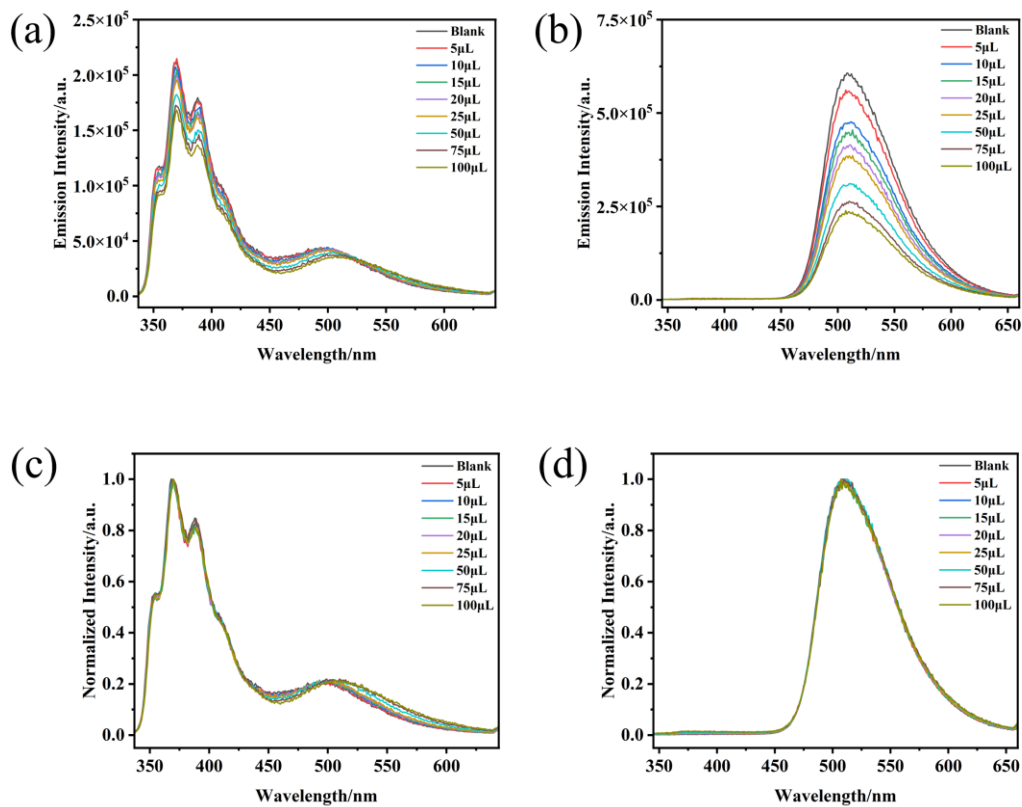

Fig. S8 Luminescence spectra of (a) **C-HBTP** ( $\lambda_{\text{ex}} = 327$  nm) and (b) **C-HBTO** ( $\lambda_{\text{ex}} = 335$  nm) in  $\text{CCl}_4$  at different DMSO concentrations. Normalized luminescence spectra of (c) **C-HBTP** ( $\lambda_{\text{ex}} = 327$  nm) and (d) **C-HBTO** ( $\lambda_{\text{ex}} = 335$  nm) in  $\text{CCl}_4$  at different DMSO concentrations.

### 3. DFT calculation

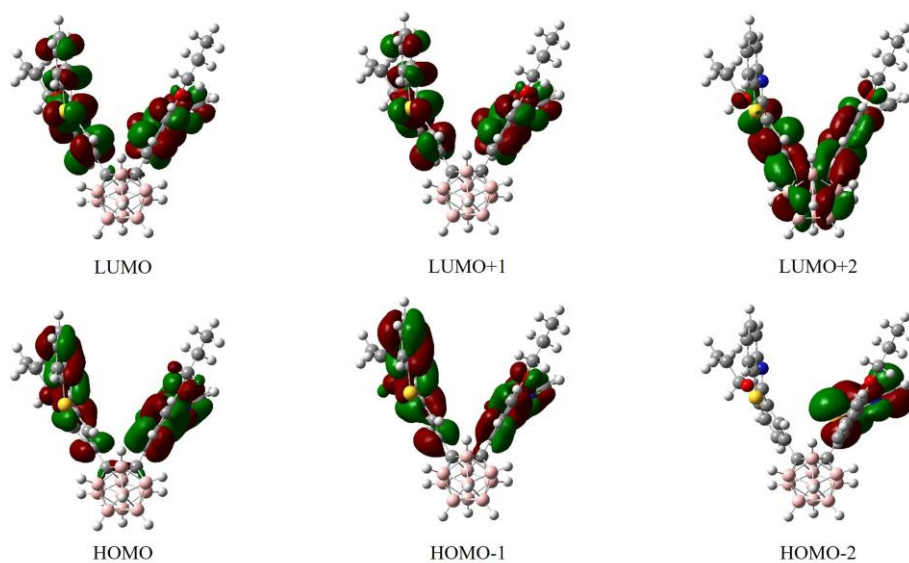

Fig. S9 The theoretical calculated ground-state frontier orbitals contributions of **C-HBTP** in gas sate using B3LYP/6-31G (d, p) level by Gaussian 09.

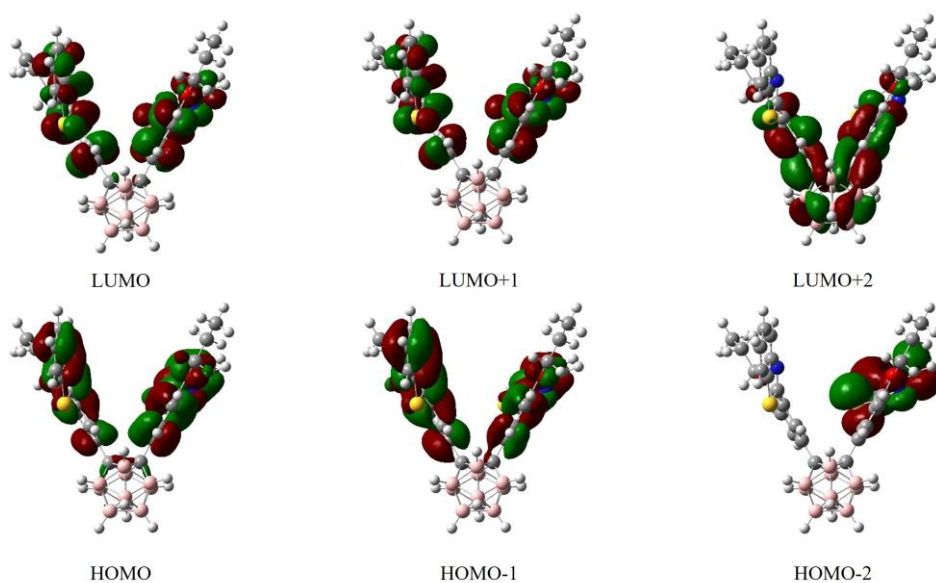

Fig. S10 The theoretical calculated UV-vis absorption frontier orbitals contributions of **C-HBTP** in gas sate estimated by TD-DFT calculation at the B3LYP/6-31G (d, p) level by Gaussian 09.



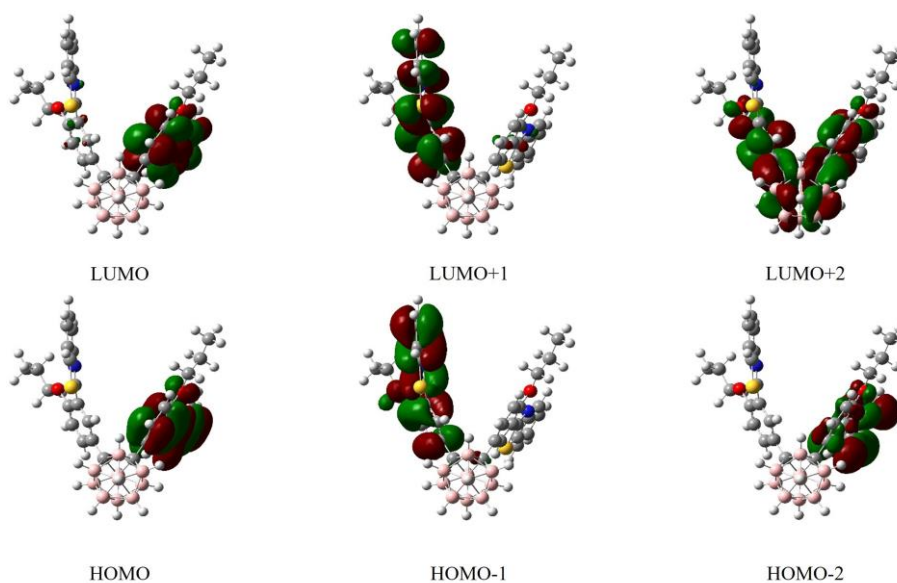

Fig. S11 The theoretical calculated singlet state (Fluorescence) frontier orbitals contributions of **C-HBTP** in gas state estimated by TD-DFT calculation at the B3LYP/6-31G (d, p) level by Gaussian 09.

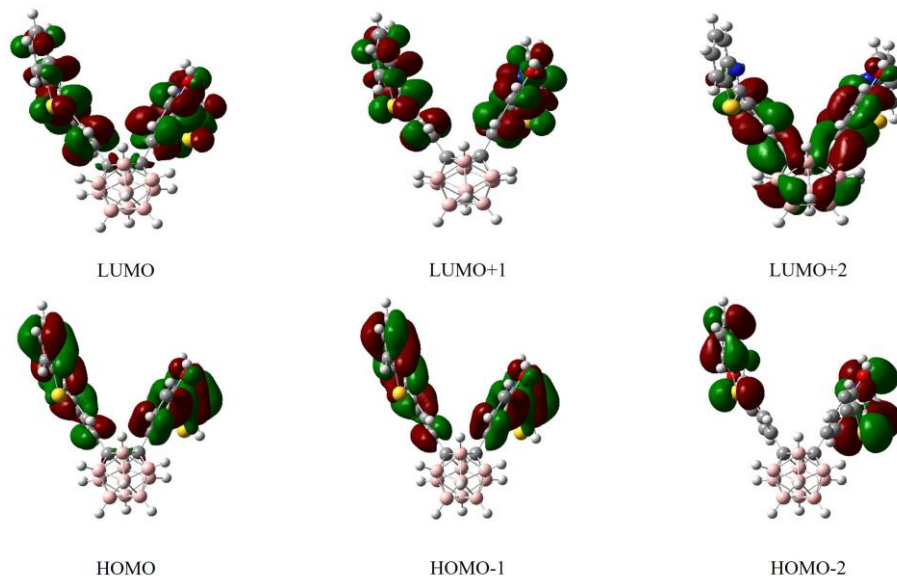

Fig. S12 The theoretical calculated ground-state frontier orbitals contributions of **C-HBTO** enol-type in gas state using B3LYP/6-31G (d, p) level by Gaussian 09.

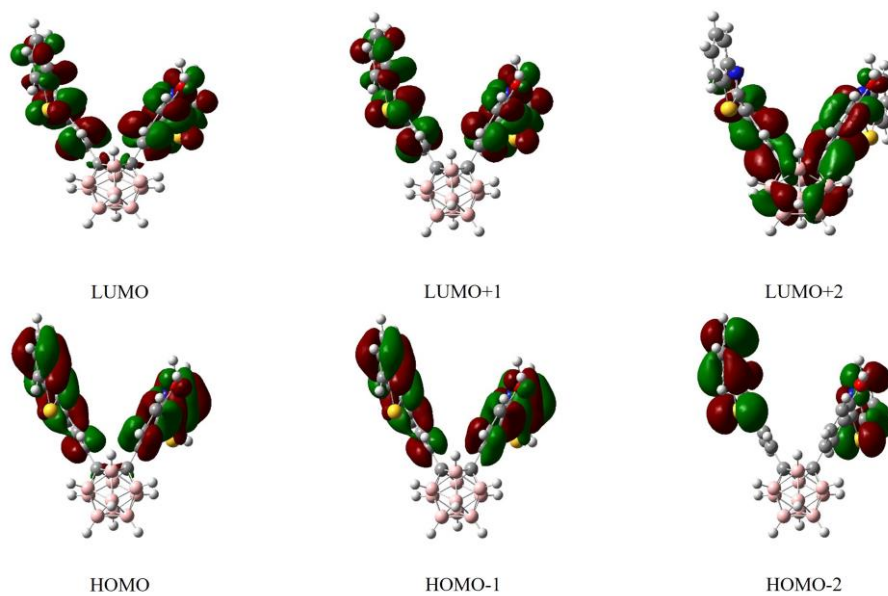

Fig. S13 The theoretical calculated UV-vis absorption frontier orbitals contributions of **C-HBTO** enol-type in gas state estimated by TD-DFT calculation at the B3LYP/6-31G (d, p) level by Gaussian 09.

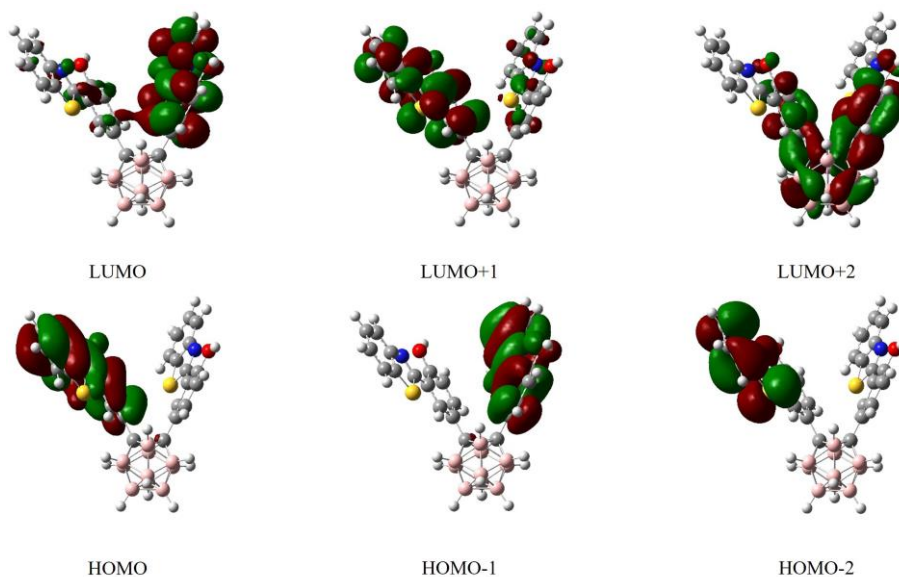

Fig. S14 The theoretical calculated singlet state (Fluorescence) frontier orbitals contributions of **C-HBTO** enol-type in gas state estimated by TD-DFT calculation at the B3LYP/6-31G (d, p) level by Gaussian 09.

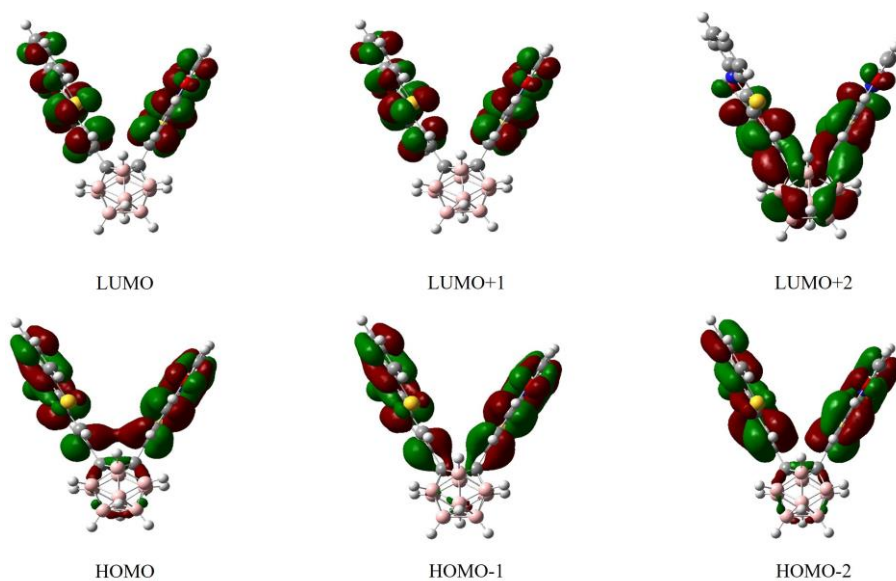

Fig. S15 The theoretical calculated ground-state frontier orbitals contributions of **C-HBTO** keto-type in gas state using B3LYP/6-31G (d, p) level by Gaussian 09.

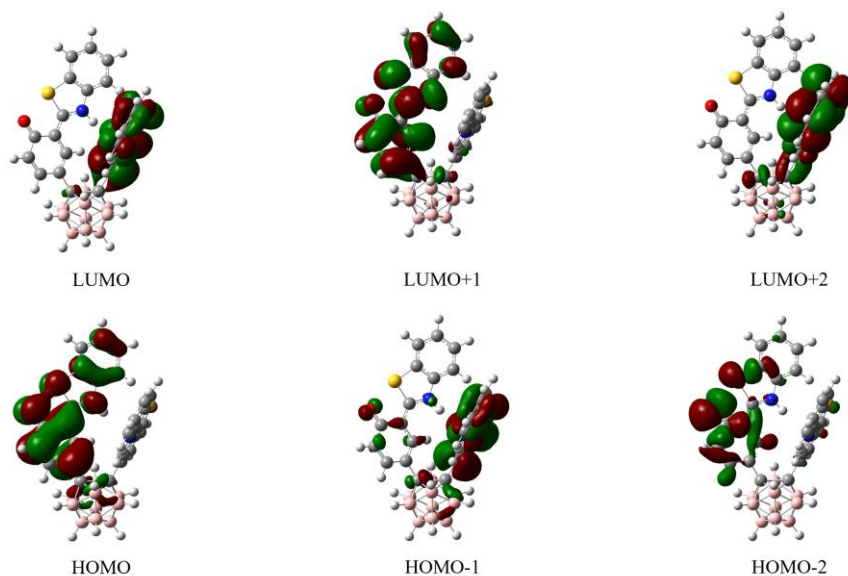

Fig. S16 The theoretical calculated UV-vis absorption frontier orbitals contributions of **C-HBTO** keto-type in gas state estimated by TD-DFT calculation at the B3LYP/6-31G (d, p) level by Gaussian 09.

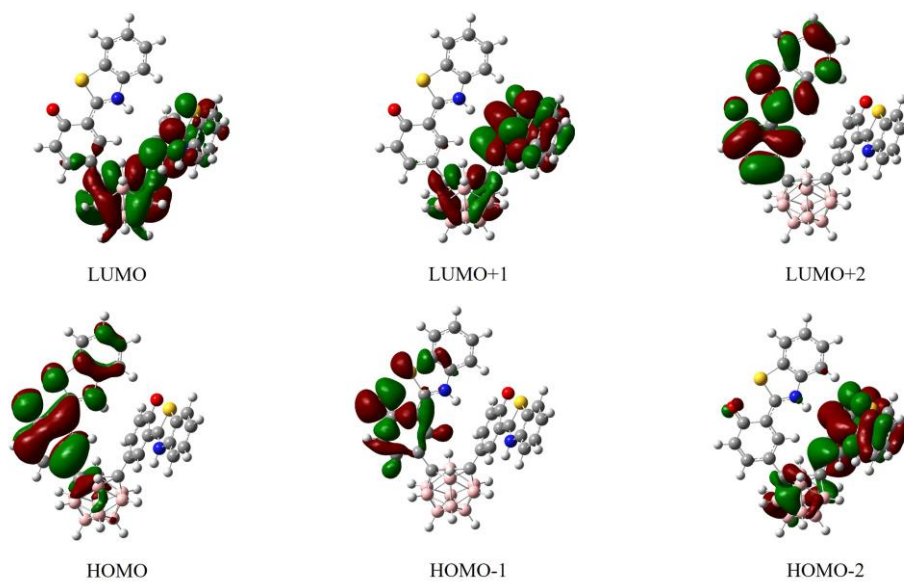

Fig. S17 The theoretical calculated singlet state (Fluorescence) frontier orbitals contributions of C-**HBTO** keto-type in gas sate estimated by TD-DFT calculation at the B3LYP/6-31G (d, p) level by Gaussian 09.

## 4. NMR Spectra of all new compounds

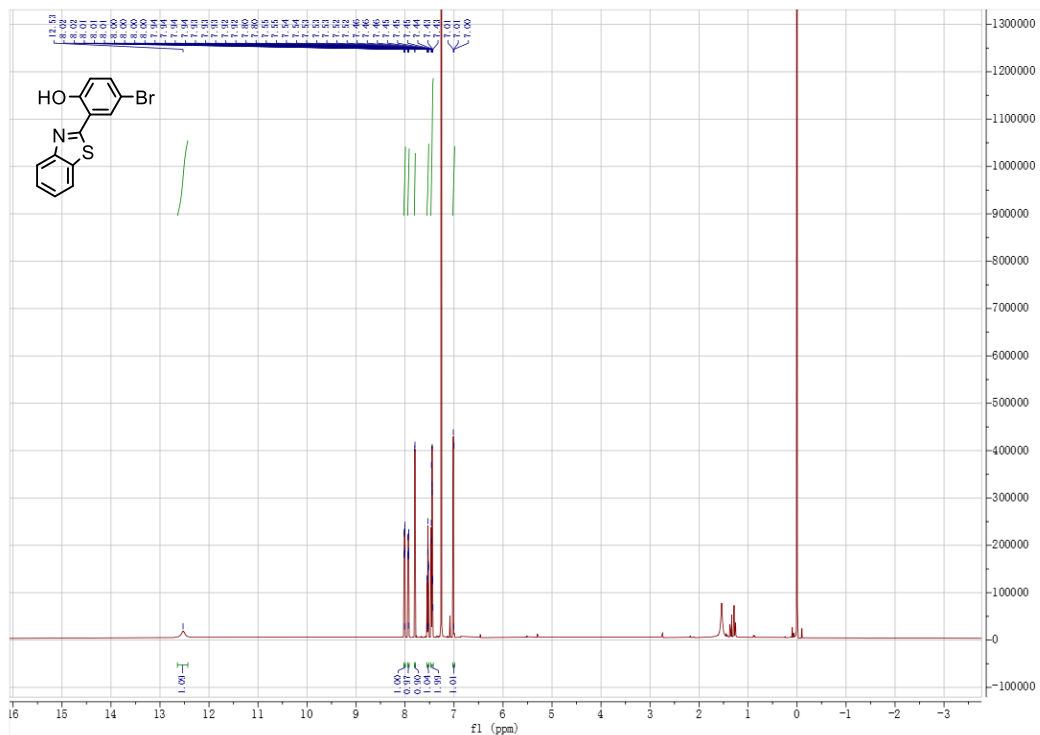

Fig. S18. <sup>1</sup>H NMR spectra of 2-(2-Benzothiazolyl)-4-bromophenol in CDCl<sub>3</sub>.

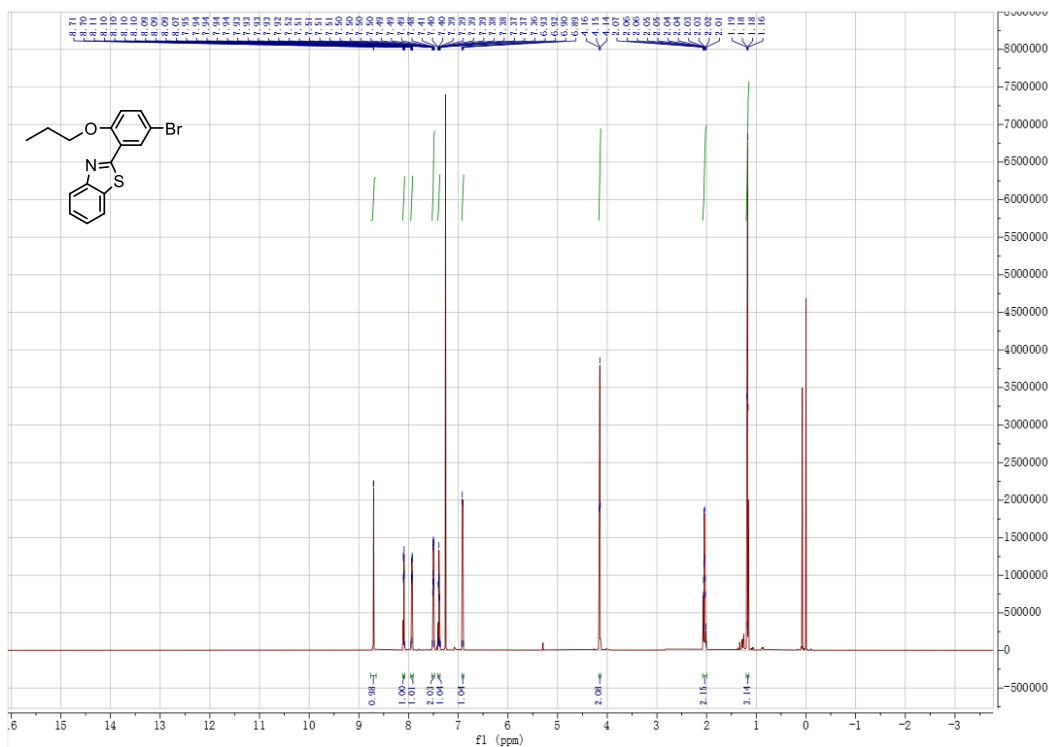

Fig. S19. <sup>1</sup>H NMR spectra of 2-(5-Bromo-2-propoxyphenyl)benzothiazole in CDCl<sub>3</sub>.





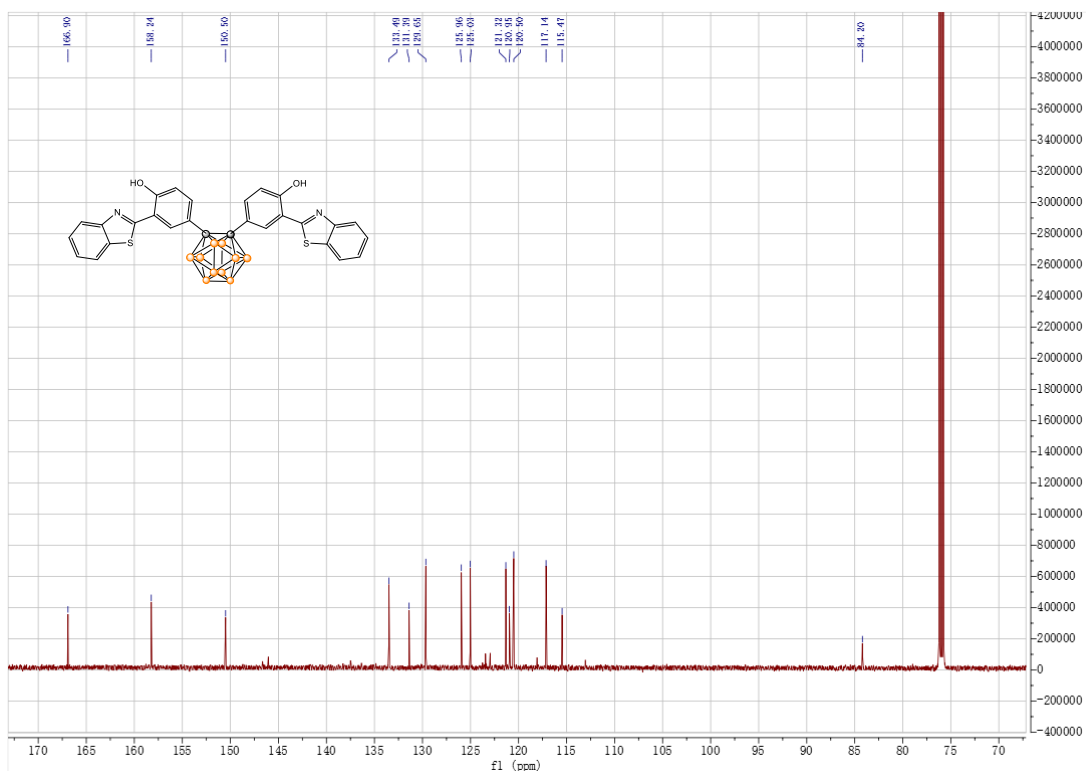

Fig. S24.  $^{13}\text{C}$  NMR spectra of C-HBTO in  $\text{CDCl}_3$ .

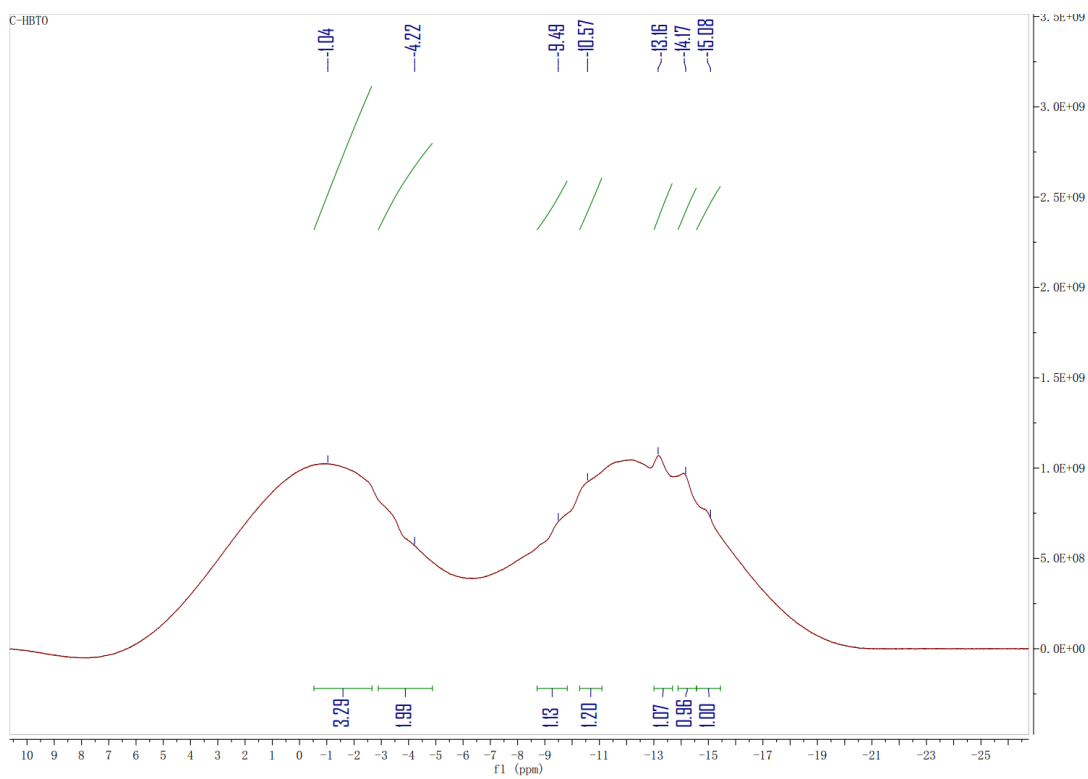

Fig. S25.  $^{11}\text{B}$  NMR spectra of C-HBTO in  $\text{Acetone-d}_6$ .



HBTP #23 RT: 0.25 AV: 1 NL: 3.61E6  
T: FTMS + p ESI Full ms [100.0000-1500.0000]

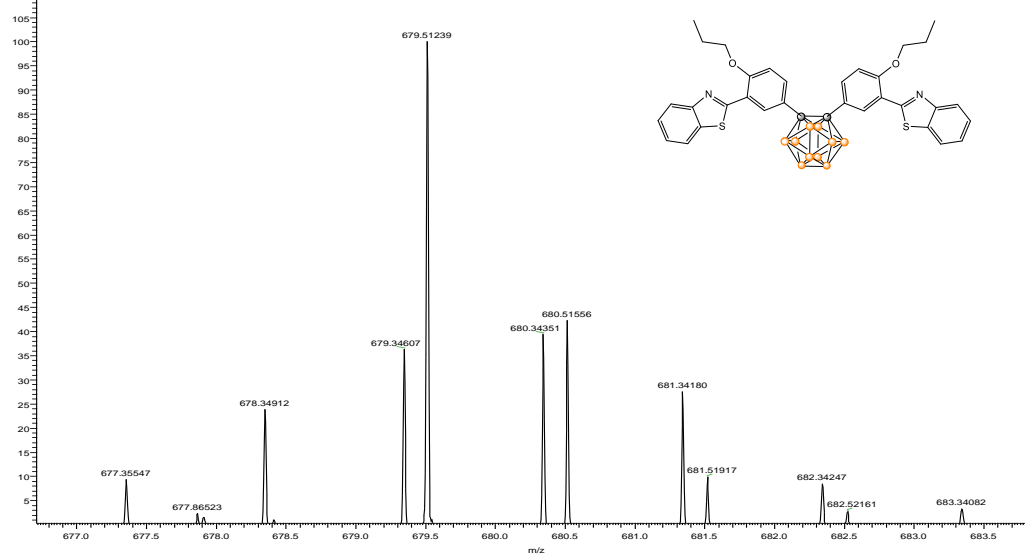

Fig. S26. The HRMS spectra of C-HBTP.

HBTO #36 RT: 0.37 AV: 1 NL: 3.05E4  
T: FTMS - p ESI Full ms [100.0000-1500.0000]

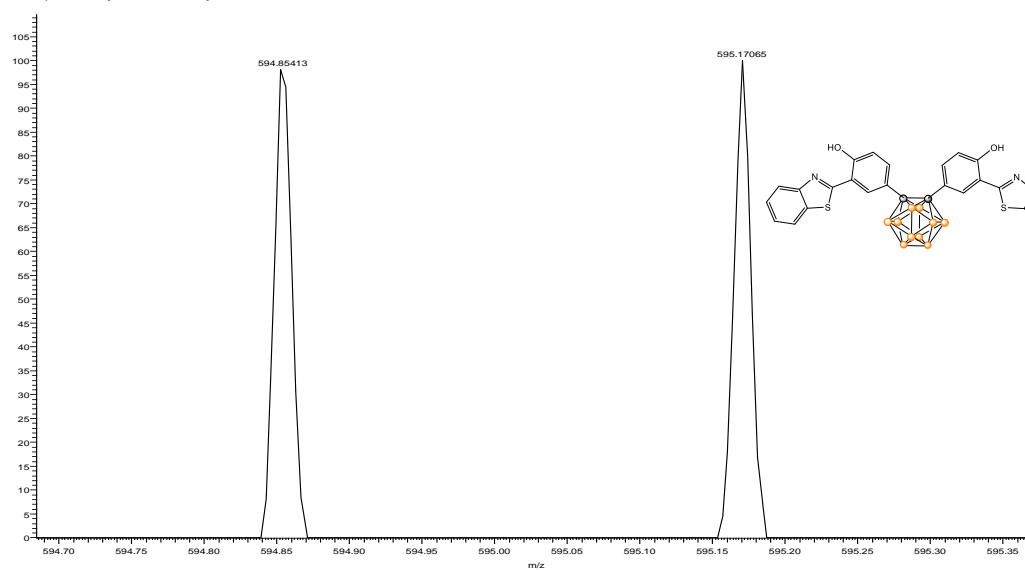

Fig. S27. The HRMS spectra of C-HBTO.

## 5. References

- 1 S. Paul, R. Nandi, K. Ghoshal, M. Bhattacharyya and D. K. Maiti, *New J. Chem.*, **2019**, 43: 3303-3308.
- 2 J. Ma, J. Zhao, P. Yang, D. Huang, C. Zhang and Q. Li, *Chem. Commun.*, **2012**, 48: 9720-9722.
- 3 J.R. Lakowicz Principles of fluorescence spectroscopy (3rd), Springer, Singapore (2010) ch.6
- 4 S.Y. Kim, Y.J. Cho, G.F. Jin, W.S. Han, H.J. Son, D.W. Cho, et al. Intriguing emission properties of triphenylamine-carborane systems *Phys Chem Chem Phys*, 17 (2015), pp. 15679-15682
- 5 Y.J. Cho, S.Y. Kim, M. Cho, W.S. Han, H.J. Son, D.W. Cho, et al. Kang. Aggregation-induced emission of diarylamino- $\pi$ -carborane triads: effects of charge transfer and  $\pi$ -conjugation *Phys Chem Chem Phys*, 18 (2016), pp. 9702-9708
- 6 V. M. Divac et al. *Spectrochimica Acta Part A: Molecular and Biomolecular Spectroscopy*, 2019, 212, 356–362.
